RESEARCH

# Evolution of Hierarchy in Bacterial Metabolic Networks

Aaron Goodman and Marcus Feldman\*

\*Correspondence:

[mfeldman@stanford.edu](mailto:mfeldman@stanford.edu)

Department of Biology, Stanford University, Stanford, CA, 94305, USA

Full list of author information is available at the end of the article

## Abstract

**Background:** In self-organized systems, the concept of flow hierarchy is a useful way to characterize the movement of information throughout a network.

Hierarchical network organizations are shown to arise when there is a cost of maintaining links in the network. A similar constraint exists in metabolic networks, where costs come from reduced efficiency of nonspecific enzymes or from producing unnecessary enzymes. Previous analyses of bacterial metabolic networks have been used to predict the minimal nutrients that a bacterium needs to grow, its mutualistic relationships with other bacteria, and its major ecological niche. Using flow hierarchy, we can also infer the tradeoffs between growth rate and metabolic efficiency that bacteria make given their environmental constraints.

**Results:** Using a comparative approach on 2,935 bacterial metabolic networks, we show that flow hierarchy in bacterial metabolic networks tracks a fundamental tradeoff between growth rate and biomass production, and reflects a bacterium's realized ecological strategy. Additionally, by inferring the ancestral metabolic networks, we find that hierarchy decreases with distance from the root of the tree, suggesting the important pressure of increased growth rate relative to efficiency in the face of competition.

**Conclusions:** Just as hierarchical character is an important structural property in efficiently engineered systems, it also evolves in self-organized bacterial metabolic networks, reflects the life-history strategies of those bacteria, and plays an important role in network organization and efficiency.

**Keywords:** modularity; hierarchy; metabolism; bacteria; reverse ecology

1

2

### 3 Background

4 In characterizing bacteria, we seek to understand both their internal processes and  
5 how they interact with other species and their environments. Techniques in cell and  
6 molecular biology have been very helpful in revealing the inner workings of bacte-  
7 ria, but do not address the ecological context in which bacteria develop and live.  
8 Increasingly, metagenomic techniques are being used to simultaneously sequence all  
9 of the bacteria present in a given environment. However, these techniques can only  
10 provide limited information about particular species, where they are found, their  
11 relative abundances, and co-occurrence patterns.

12 By studying the structure and evolution of a bacterium's metabolic network, we  
13 can move beyond correlational profiles to understand both the underlying pressures  
14 that have driven its evolution as well as the ecological role it occupies. A bacterium's  
15 ability to reproduce depends on the efficiency of its metabolism, which we can  
16 study as a network of metabolites linked together by the enzymes that transform  
17 one metabolite into another [1]. The structure of these networks varies across the  
18 bacterial kingdom and reflects the environmental pressures that guide bacterial  
19 evolution. Thus, a bacterium's metabolic network can be used to predict the minimal  
20 nutrients that it needs to grow, its mutualistic relationships with other bacteria, and  
21 its major ecological niche [2][3][4]. In describing metabolic networks, two types of  
22 hierarchies can be helpful: flow hierarchy and containment hierarchy.

23 Previous study of the hierarchical nature of metabolic networks has tended to  
24 focus on containment hierarchy, which represents the nodes in a network as being  
25 contained within modules, which themselves are contained within other modules,  
26 and so on, in a recursive fashion. For example, a containment hierarchy may be used  
27 to represent the organization of a firm, with divisions, departments, teams and in-  
28 dividual employees. Applied to metabolic networks, such modules correspond to  
29 known pathways [11][12], and modular hierarchy has been hypothesized to increase  
30 evolvability of metabolism [13]. Simulations of Boolean logic networks have sug-  
31 gested that modularity evolves in changing environments, and it has been hypothe-  
32 sized that this would be reflected in bacterial metabolic networks[14][15]. However  
33 this has not been borne out [16]; differences in modularity of metabolic networks  
34 have been found to be moderately correlated with the phylogenetic divergence of

35 the organisms, and there is a general trend of loss of modularity over evolutionary  
36 time due to the addition of peripheral pathways during niche specialization [17].

37 In this work, we focus on the heretofore neglected type of hierarchy: flow hierarchy.  
38 While containment hierarchy represents the organization of a network as a series  
39 of modules, flow hierarchy characterizes the way information moves throughout the  
40 network. Information is acquired at the lowest level of the hierarchy and transmitted  
41 to higher levels, where it is aggregated and passed upward; at the same time orders  
42 come from the top of the hierarchical network and are passed down to lower levels.

43 Flow hierarchy is used to describe networks in many fields, particularly in the  
44 study of information accrual networks. In engineering, information accrual networks  
45 are used in the design of control systems, and in the social sciences, they are used to  
46 study the organization of firms [5][6]. To use the example of the firm, flow hierarchy  
47 could be used to represent the movement of orders and responsibilities throughout  
48 the firm, as low-level employees report upwards to supervisors who aggregate reports  
49 for department heads and so on, while orders flow downward from decision makers  
50 to executors. As bacteria synthesize the complex molecules needed for survival, they  
51 reduce the overall entropy within the cell. Given the thermodynamic equivalence of  
52 entropy reduction and information accrual, this reduction can also be viewed as an  
53 increase of information. Thus we can use the metabolic network graph to study the  
54 flow of information through the cell.

55 Although flow hierarchy (hereafter referred to as hierarchy) has not been well stud-  
56 ied in metabolic networks, it has been identified in a variety of other self-organized  
57 networks, including food webs, neural networks, and the transcription factor net-  
58 work in *D. melanogaster*, where the degrees of hierarchy were significantly higher  
59 than would be expected in a random network with the same degree distribution [7].  
60 In studying hierarchy in metabolic networks, we are able not only to learn that  
61 hierarchy appears higher than would be expected by a random configuration, but  
62 also to assess adaptive benefits that hierarchy provides.

63 These findings show that hierarchy is common among self-organized networks,  
64 but they do not explain when hierarchical network organization would provide a  
65 selective advantage. A number of comparative approaches have been used to make  
66 inferences about the forces guiding the development of networks in other disci-  
67 plines, and from them we can deduce some of the adaptive benefits that hierarchy

68 provides. Simulated evolution experiments of Boolean logic networks have shown  
69 that the cost of maintaining links between nodes is the driving force in the emer-  
70 gence of hierarchy [19]. Hierarchical characteristics have also been shown to predict  
71 the costs of maintaining information-sharing relationships in emergent social net-  
72 works and reflect the degree of market variability that supply chains may be able to  
73 withstand [21]. We know that bacterial metabolic networks face similar constraints.  
74 Maintaining catalytic abilities between metabolites incurs a cost either as a trade-  
75 off between specificity and efficiency, or from production and replication of unused  
76 enzymes [20][22]. We show that the strength of these constraints is correlated with  
77 degree of hierarchy in metabolic networks.

78 To measure flow hierarchy quantitatively, researchers commonly use the global  
79 reaching centrality (GRC), defined as the average difference between the maximum  
80 local reaching centrality (i.e. fraction of nodes in the network accessible by each node  
81 of the network) and the local reaching centrality [23]. In essence, GRC is a measure  
82 of heterogeneity in the flow of information throughout a network. For example, a  
83 dictatorial firm where the boss exerts great influence over the entire company while  
84 individual employees have little sway would have a higher GRC than a consulting  
85 firm run by a group of partners, each of whom oversees a small group of highly  
86 collaborative employees. Other, less widely used measures of flow hierarchy are an  
87 eigenvector centrality based method, the fraction of edges participating in cycles,  
88 or by decomposition into treeness, feedforwardness, and orderability [7][8][9].

89 Studying the evolution of containment hierarchy can tell us about the environ-  
90 mental contingencies that inform the evolution of metabolic networks (e.g. resource  
91 availability, temperature, environmental variation, etc). However, by studying flow  
92 hierarchy we can also infer the different growth strategies a bacterium may pursue,  
93 furthering our understanding of how it fills its ecological niche [13]. We employ  
94 the reverse ecology principle to understand how the hierarchical character of a  
95 metabolic network reflects the life-history strategy of a bacterium in relationship to  
96 the growth-yield tradeoff, as well as its environmental niche. As bacteria first adapt  
97 to new habitats they may develop novel metabolic functions, leading to an increase  
98 in hierarchy, since the new metabolic functions are added to the periphery of the  
99 network.

100 As those ecosystems evolve, however, some bacteria may adopt higher-growth  
101 rate strategies in response to increased competition, at the expense of efficiency  
102 and consequently metabolic network hierarchy. Since only some bacteria adopt such  
103 high-growth rate strategies, while others maintain higher degrees of hierarchy and  
104 efficiency, variance in hierarchy increases overall. Though both hierarchy and mod-  
105 ularity correlate with bacterial specialization, we find that, contrary to the Boolean  
106 network simulations, there is little evolutionary relationship between the two, and  
107 that there is more conservation of hierarchy than modularity over time.

108

## 109 **Results and Discussion**

### 110 **Networks**

111 Networks were reconstructed from 2,935 bacteria species in the KEGG database.  
112 These networks were robust to misannotation of enzymes. In random perturbations  
113 of the metabolic network for *E. coli* with 10% of the reactions removed, 95% the  
114 networks had hierarchy scores within 12% of the true network, and with 10% of  
115 reactions reversed, within 6% of the true network.

116 Network sizes ranged from 76 to 1496 metabolites, with a mean of 848. The  
117 smallest was the obligate insect parasite *Nasuia deltocephalinicola* and the largest  
118 was the soil bacterium *Burkholderia lata*.

### 119 **Hierarchy**

120 Hierarchy scores for the metabolic networks were calculated using the GRC hierar-  
121 chy score [23]. The mean degree of hierarchy was 0.279, and ranged from 0.065, for  
122 the insect symbiote Candidatus *Nasuia deltocephalinicola*, to 0.385 for a *Blattabac-*  
123 *terium* endosymbiont of *Nauphoeta cinerea*, an insect endosymbiote. The hierarchy  
124 score for *E. coli* strains was 0.269 (Figure 1). For comparison with a random net-  
125 work and real world networks, GRC hierarchy scores for an Erdős-Rényi random  
126 graph is 0.058, a scale-free network 0.127, and a tree 0.997, an estuary food web  
127 0.814, and the neuronal network of *C. elegans* [23].

### 128 **Relationship to environment and growth rate**

129 There is a fundamental ecological trade off between growth rate and yield, which is a  
130 result of the underlying efficiencies of the reactions. Bacteria that have a metabolism

131 that produces the maximal growth rate per amount of carbon taken up will have  
132 suboptimal biomass production, and vice versa.

133 This tradeoff is representative of fundamentally divergent ecological strategies that  
134 bacteria use [24]. Furthermore, the tradeoffs between growth and yield are repre-  
135 sented in the constraints on the metabolic network, such that high-yield strategies  
136 lead to more hierarchical networks. There is a tradeoff between enzyme specificity  
137 and efficiency, so when yield is favored there will be higher costs of maintaining  
138 edges in the network, which leads to hierarchy [25] [20]. Rapidly growing bacte-  
139 ria have more metabolic cycles which allow for metabolic flexibility at the cost of  
140 wasted energy, and these cycles decrease hierarchy [26]. The cost of maintaining  
141 unused enzymes in the genome is higher when efficiency is paramount [22].

142 Using a dataset of 111 bacteria with known growth rates, we see that the hier-  
143 archical character of the network correlates inversely with growth rate, Spearman  
144  $\rho = -0.31$ ,  $p < 0.0007$ , fig 2. Furthermore, there is evidence that carbon efficiency  
145 constraints on bacteria differs greatly by environment, and that the evolutionary dy-  
146 namics of carbon usage niche specialization are stronger within populations [27][28].  
147 When we control for the bacterial environment, we see a correlation of  $\rho = -0.41$ ,  
148 which is significantly greater than 0 ( $p < 0.0001$ , and significantly greater than the  
149 correlation when not controlling for the environment  $p < 0.003$ ). Bacteria with hier-  
150 archy score greater than the median hierarchy score grow at a rate of 0.64 doublings  
151 per hour, compared to 1.44 doublings per hour for bacteria with hierarchy score less  
152 than the median, *i.e.* bacteria with the less hierarchical metabolic networks grow  
153 2.25 times faster than those with more hierarchical networks ( $p < 0.0002$ ).

154 Thus the hierarchical character of the metabolic networks reflects the growth  
155 rate of the organisms and their environmental niche. These constraints of edge  
156 weight and tradeoffs between hierachical and ahierachical networks in metabolism  
157 are similar to those made in social networks and supply chains [20] [21].

#### 158 Relationship to other network properties

159 In addition to measuring hierarchy, we evaluated a number of other network statis-  
160 tics. We computed node count, edge count, modularity (as evaluated by the Girvan-  
161 Newman algorithm [29]), clustering coefficient, full diameter, effective diameter,  
162 number of strongly connected components, proportion of the nodes in the largest

163 strongly connected component, and Luo Hierarchy score, an alternative metric of  
164 hierarchy that measures the proportion of edges that do not participate in any cy-  
165 cles. Edge and node count correlated most strongly with genetic distance. However,  
166 after these basic structural properties, the statistics that correlated most highly  
167 with genetic distance were the Girvan-Newman modularity score and the GRC hi-  
168 erarchy score (Table 1). We also computed the partial correlation for each variable  
169 with genetic distance, controlling for the others, and found that the GRC metric  
170 had the highest partial correlation.

### 171 Hierarchy Over Time

172 The hierarchy of the KEGG bacteria and reconstructed ancestors seems to first  
173 increase, and then decrease with distance from the root of the tree (Figure 3).  
174 Interestingly, with the dataset of 2,935 from the latest KEGG database, the cor-  
175 relation of modularity and distance from the root of the tree found by Kreimer *et*  
176 *al.* [17] is actually reversed. Modularity appears to increase rather than decrease  
177 with distance from the root, (Figure 4). This correlation remains positive when  
178 restricting analysis to the species used by Kreimer *et al.*.

179 As bacteria specialize to niches in a given ecosystem, they take on different  
180 metabolic strategies, which are reflected in the hierarchical profile of the metabolic  
181 network. This difference in strategies is consistent with the rise and fall of hierarchy  
182 over the evolutionary trajectory. As microbes first adapt to new environments or  
183 habitats (niche *sensu* Grinnell) they must gain novel metabolic functions, which are  
184 added as pathways in the periphery in the network and which increases the hier-  
185 archical character [30]. As complex relationships develop within the habitats, and  
186 bacteria adapt to different resource use profiles and competitive strategies (niche  
187 *sensu* Elton), the hierarchical profile of the metabolic network diversifies. Thus, the  
188 decrease in hierarchy over evolutionary time is caused by more bacteria specializing  
189 in a rapid-growth strategy, but the increasing variance in hierarchy reflects the fact  
190 that not all bacteria adopt this strategy. In studying the adaptive strategies chosen  
191 by different bacteria, we may be able to make inferences about the bacteria and  
192 their environments, as well as the interplay between evolutionary and ecological  
193 dynamics.

## 194 Correlation of Modularity and Hierarchy

195 Hierarchy and modularity are global properties of metabolic networks. Both cor-  
196 relate with bacterial specialization and both change with distance from the root  
197 of the phylogenetic tree. Using the method of phylogenetic independent contrasts  
198 to look for correlation independent of phylogenetic structure, we found a mod-  
199 erate inverse correlation between modularity and hierarchy (Pearson correlation  
200  $r = -0.18, p < 10^{-15}$ ), suggesting little evolutionary relationship between modu-  
201 larity and hierarchy [31]. Interestingly, simulated Boolean networks demonstrate a  
202 positive correlation between modularity and hierarchy [19].

## 203 Conclusion

204 Characterizing the hierarchical structure of metabolic networks is useful in un-  
205 derstanding the constraints under which these networks evolve. Hierarchy corre-  
206 lates with phylogenetic divergence, as would be expected for a trait subject to  
207 natural selection. This correlation is similar to the correlation of phylogenetic dis-  
208 tance and modularity, suggesting that the hierarchical organization of networks,  
209 like modular organization, is important for function. However, modularity should  
210 be viewed as complementary to, rather than supplanted by, hierarchy when analyz-  
211 ing the global organization of metabolic networks. Both structural properties are  
212 conserved across phylogenies and evolve together. A better understanding of the  
213 character of metabolic networks is valuable in the growing field of ‘reverse ecol-  
214 ogy,’ in which the observed networks can be used to make inferences on possible  
215 environments [2][32][33].

216 By algorithmically reconstructing the metabolic networks, we are able to perform  
217 a larger-scale analysis than has previously been reported. Although the reaction  
218 annotations in KEGG may be prone to errors or omissions, we find that the GRC  
219 hierarchy metric is robust to small amounts of reaction omissions or reversals. By  
220 expanding the scope of the analysis, we find that modularity is actually inversely  
221 correlated with distance from the root of the tree, contrary to what has been found  
222 in previous studies of a more limited set of bacteria.

223 From reconstructed ancestral metabolic networks, we are able to infer how hierar-  
224 chy evolves in networks over time, and understand the interplay between evolution-  
225 ary and ecological dynamics. Hierarchy shows an increase followed by a decrease



226 across the phylogenetic tree, which is reflective of the adaptive process of bacteria,  
227 first to novel fundamental niches, and then to a realized niche. The net trend in  
228 decreasing hierarchy reflects a dominance of fast-growth, low-efficiency strategy.

## 229 **Methods**

### 230 Hierarchy Metric

231 Hierarchy scores were calculated using the global reaching centrality metric devel-  
232 oped by Mones *et al.*, which is based on the local reaching centrality [23]. The  
233 local reaching centrality (LRC) of a node in a network is the fraction of the nodes  
234 of the network that can be reached starting at the focal node. More precisely, if  
235 the metabolic network is represented as a graph,  $G = (V, E)$  it can be said that  $v$   
236 reaches  $v'$  if there exists a series of edges  $(v, v_i), (v_i, v_j) \dots (v_j, v') \in E$ . Let  $R(v)$  be  
237 the set of nodes  $v' \in V$  where  $v'$  is reachable from  $v$ . Then the LRC of  $v$  is  $\frac{|R(v)|-1}{|V|-1}$ .  
238 The GRC is then  $\frac{1}{|V|-1} \sum_{v \in V} \max_{v' \in V} \text{LRC}(v') - \text{LRC}(v)$

### 239 Modularity Metric

240 The modularity metric was calculated using the SNAP package [34]. The modularity  
241 of a network is the optimal partitioning of the nodes into clusters to maximize  
242  $Q = \frac{1}{4m} \sum_{ij} \left( A_{ij} - \frac{k_i k_j}{2m} I_{ij} \right)$ . Where  $m$  is the number of edges in the network,  $A_{ij}$   
243 is the adjacency matrix, i.e.  $A_{ij}$  is 1 if there is an enzyme that converts metabolite  
244  $i$  into metabolite  $j$ .  $k_i$  is the number of reactions that metabolite  $i$  participates in,  
245 and  $I_{ij} = 1$  if  $i$  and  $j$  are in the same module, and  $-1$  otherwise. Since finding the  
246 global optimal of  $Q$  is an NP-hard problem, we use the method developed by Girvan  
247 and Newman, which partitions the network by iteratively removing the edge with  
248 the highest betweenness centrality [29].

### 249 Robustness of Reconstruction

250 The KEGG database is large, with heavy manual curation; however, this does not  
251 mean that the data are always perfect. A reaction may be favorable in one direction  
252 in a model organism in laboratory conditions, but might proceed in the opposite  
253 direction or become bidirectional in different environments or species. It is also  
254 possible that reactions are missing from the database, or that an enzyme placed  
255 in an orthology group based on the study of one species may catalyze a different  
256 reaction in other species. To evaluate robustness to errors in the KEGG database,

257 we examined the network for the well-studied bacterium, *E. coli*. We performed 100  
258 replicates dropping or reversing 10% of the reactions, evaluated the hierarchy scores  
259 of these networks, and calculated the spread of the central 95% of hierarchy scores.

#### 260 Reconstruction of Genetic Distance

261 Following the methods often used in bacterial comparative genomics [35][3][36], for  
262 each of the 2,935 species, the 16s ribosomal sequence from KEGG was aligned to  
263 the Greenegenes database using PyNast, resulting in multiple sequence alignments  
264 for the 2,935 species [37][38]. The genetic distances between all pairs of bacterial  
265 species were computed using the Kimura distance metric [39].

#### 266 Reconstruction of Networks

267 For each bacterial species, a network of metabolites was inferred based on the en-  
268 zymes present in the genome, the reactions known to be catalyzed by the enzymes  
269 present or orthologous enzymes, and a database of reaction substrates and prod-  
270 ucts. The KEGG database of the genomic content of the 2,935 bacterial genomes  
271 was used to identify which enzyme classes were present in each genome and which re-  
272 actions were present [40]. The reaction information from KEGG was supplemented  
273 by a the bioreaction database from Stelzer *et al.* which excludes currency metabo-  
274 lites, improves on predictions of directionality of reactions, and, for reactions with  
275 multiple substrates and products, provides carbon tracking of which substrates are  
276 converted to which products [41]. Using this reaction information, networks were  
277 constructed with metabolites as nodes, and a directed edge was placed between  
278 metabolites if there was a reaction that converted one metabolite to another. If re-  
279 actions were reversible, then bi-directional edges were added between the substrates  
280 and products.

#### 281 Ancestral Networks

282 To construct the ancestral networks, a phylogenetic tree was reconstructed using  
283 RAxML 8.2.9 and the 16-state GTR nucleotide substitution model with gamma  
284 rate heterogeneity [42]. The branch-length weighted average bootstrap support of  
285 the partitions over 300 trees was 85.4. Using the maximum likelihood estimate of the  
286 best tree, at each interior node of the phylogenetic tree, a genome was constructed  
287 using the Fitch small parsimony algorithm. In cases where the presence or absence

288 of a gene was equally parsimonious, the gene was randomly selected to be included.  
289 These ancestral genomes were then used to reconstruct ancestral networks, just as  
290 the networks were constructed on the leaves of the tree.

#### 291 Niche strategies

292 Growth rate data for 113 bacterial species and environmental annotations for those  
293 bacteria, which for 68 species were gathered from NCBI, and manual curation fol-  
294 lowing literature review was used for the remaining 45 [43][4]. Due to their low  
295 number, the two aquatic species in the data set were excluded from further anal-  
296 ysis. Correlations were calculated as Spearman's  $\rho$ . To calculate correlation con-  
297 trolling for environment,  $\rho$  was calculated within each environment, and a species  
298 weighted-average across environments was computed. Due to several bacteria hav-  
299 ing the same growth rates,  $p$ -values were calculated using permutation tests rather  
300 than the Student's  $t$ -distribution approximation. Significance tests were performed  
301 with 100,000 permutations each. For the overall  $\rho$ , permutations were done across  
302 all bacteria. To test the strength of the habitat-controlled correlation, growth rates  
303 were permuted within habitat classes and the species-weighted  $\rho$  was computed for  
304 each permutation. To test the effect of controlling for the environment, habitat la-  
305 bels were permuted and the difference between the species weighted  $\rho$  and overall  
306  $\rho$  was computed.

#### 307 Consent to Publish

308 All authors have approved this manuscript for submission. This work has not been published or submitted elsewhere.

#### 309 Competing interests

310 The authors declare that they have no competing interests.

#### 311 Author Contributions

312 AG designed the experiment, carried out the analysis, and wrote the paper. MF provided critical guidance on the  
313 direction of the work, and revision of the manuscript.

#### 314 Availability of the Data

315 The dataset supporting the conclusions of this article, specifically the reconstructed metabolic network  
316 (Supplementary File 1) and topological statistics (Supplementary File 2) of these networks, are included within the  
317 article (and its additional files).

#### 318 Acknowledgments

319 We are grateful to B Callahan, E Borenstein and J Leskovec for helpful feedback with this work, and to editor Richard  
320 Goldstein and two anonymous reviewers for there insightful comments.

321 **References**

- 322 1. Ma, H., Zeng, A.-p.: Reconstruction of metabolic networks from genome data and analysis of their global  
323 structure for various organisms. *Bioinformatics* **19**(2), 270–277 (2003)
- 324 2. Borenstein, E., Kupiec, M., Feldman, M.W., Ruppín, E.: Large-scale reconstruction and phylogenetic analysis of  
325 metabolic environments. *Proceedings of the National Academy of Sciences of the United States of America*  
326 **105**(38), 14482–7 (2008). doi:[10.1073/pnas.0806162105](https://doi.org/10.1073/pnas.0806162105)
- 327 3. Levy, R., Borenstein, E.: Metabolic modeling of species interaction in the human microbiome elucidates  
328 community-level assembly rules. *Proceedings of the National Academy of Sciences* **110**(31), 12804–12809  
329 (2013). doi:[10.1073/pnas.1300926110](https://doi.org/10.1073/pnas.1300926110)
- 330 4. Freilich, S., Kreimer, A., Borenstein, E., Yosef, N., Sharan, R., Gophna, U., Ruppín, E.:  
331 Metabolic-network-driven analysis of bacterial ecological strategies. *Genome biology* **10**(6), 61 (2009).  
332 doi:[10.1186/gb-2009-10-6-r61](https://doi.org/10.1186/gb-2009-10-6-r61)
- 333 5. Brooks, R.: A robust layered control system for a mobile robot. *IEEE Journal on Robotics and Automation*  
334 **2**(1), 14–23 (1986). doi:[10.1109/JRA.1986.1087032](https://doi.org/10.1109/JRA.1986.1087032). [10.1003](https://doi.org/10.1003)
- 335 6. Teece, D.J.: Firm organization, industrial structure, and technological innovation. *Journal of Economic*  
336 *Behavior & Organization* **31**(2), 193–224 (1996). doi:[10.1016/S0167-2681\(96\)00895-5](https://doi.org/10.1016/S0167-2681(96)00895-5)
- 337 7. Luo, J., Magee, C.: Detecting evolving patterns of selforganizing networks by flow hierarchy measurement.  
338 *Complexity* (2011)
- 339 8. Czégel, D., Palla, G.: Random walk hierarchy measure: What is more hierarchical, a chain, a tree or a star?  
340 *Scientific Reports* **5**(December), 17994 (2015). doi:[10.1038/srep17994](https://doi.org/10.1038/srep17994). [arXiv:1508.07732v1](https://arxiv.org/abs/1508.07732v1)
- 341 9. Corominas-Murtra, B., Goñi, J., Solé, R.V., Rodríguez-Caso, C.: On the origins of hierarchy in complex  
342 networks. *Proceedings of the National Academy of Sciences of the United States of America* **110**(33),  
343 13316–21 (2013). doi:[10.1073/pnas.1300832110](https://doi.org/10.1073/pnas.1300832110). [1303.2503](https://doi.org/10.1303.2503)
- 344 10. Lorenz, D.M., Jeng, A., Deem, M.W.: The emergence of modularity in biological systems. *Physics of Life*  
345 *Reviews* **8**(2), 129–160 (2011). doi:[10.1016/j.plrev.2011.02.003](https://doi.org/10.1016/j.plrev.2011.02.003). [1204.5999](https://doi.org/10.1204.5999)
- 346 11. Ravasz, E., Somera, A.L., Mongru, D.A., Oltvai, Z.N.: Hierarchical Organization of Modularity in Metabolic  
347 *Networks* **297**(August), 1551–1555 (2002)
- 348 12. Sales-Pardo, M., Guimerà, R., Moreira, A.A., Amaral, L.A.N.: Extracting the hierarchical organization of  
349 complex systems. *Proceedings of the National Academy of Sciences of the United States of America* **104**(39),  
350 15224–15229 (2007). doi:[10.1073/pnas.0703740104](https://doi.org/10.1073/pnas.0703740104). [0705.1679](https://doi.org/10.0705.1679)
- 351 13. Braakman, R., Smith, E.: The compositional and evolutionary logic of metabolism. *Physical biology* **10**(1),  
352 011001 (2013). doi:[10.1088/1478-3975/10/1/011001](https://doi.org/10.1088/1478-3975/10/1/011001). [1207.5532](https://doi.org/10.1207.5532)
- 353 14. Kashtan, N., Alon, U.: Spontaneous evolution of modularity and network motifs. *Proceedings of the National*  
354 *Academy of Sciences of the United States of America* **102**(39), 13773–13778 (2005).  
355 doi:[10.1073/pnas.0503610102](https://doi.org/10.1073/pnas.0503610102)
- 356 15. Parter, M., Kashtan, N., Alon, U.: Environmental variability and modularity of bacterial metabolic networks.  
357 *BMC evolutionary biology* **7**, 169 (2007). doi:[10.1186/1471-2148-7-169](https://doi.org/10.1186/1471-2148-7-169)
- 358 16. Takemoto, K.: Does Habitat Variability Really Promote Metabolic Network Modularity? *PLoS ONE* **8**(4), 2–10  
359 (2013). doi:[10.1371/journal.pone.0061348](https://doi.org/10.1371/journal.pone.0061348)
- 360 17. Kreimer, A., Borenstein, E., Gophna, U., Ruppín, E.: The evolution of modularity in bacterial metabolic  
361 networks. *Proceedings of the National Academy of Sciences of the United States of America* **105**(19), 6976–81  
362 (2008). doi:[10.1073/pnas.0712149105](https://doi.org/10.1073/pnas.0712149105)
- 363 18. Muchnik, L., Itzhack, R., Solomon, S., Louzoun, Y.: Self-emergence of knowledge trees: Extraction of the  
364 Wikipedia hierarchies. *Physical Review E* **76**(1), 016106 (2007). doi:[10.1103/PhysRevE.76.016106](https://doi.org/10.1103/PhysRevE.76.016106)
- 365 19. Clune, J., Mouret, J.-B., Lipson, H.: The Evolutionary Origins of Hierarchy. *PLOS Computational Biology*  
366 **280**(1755), 20122863 (2016). doi:[10.1098/rspb.2012.2863](https://doi.org/10.1098/rspb.2012.2863). [1207.2743v1](https://doi.org/10.1207.2743v1)
- 367 20. Nepusz, T., Vicsek, T.: Hierarchical self-organization of non-cooperating individuals. *PLoS ONE* **8**(12) (2013).  
368 doi:[10.1371/journal.pone.0081449](https://doi.org/10.1371/journal.pone.0081449). [1308.0029](https://doi.org/10.1308.0029)
- 369 21. Hu, F., Zhao, S., Bing, T., Chang, Y.: Hierarchy in industrial structure: The cases of China and the USA.  
370 *Physica A: Statistical Mechanics and its Applications* **469**, 871–882 (2016). doi:[10.1016/j.physa.2016.11.083](https://doi.org/10.1016/j.physa.2016.11.083)
- 371 22. D’Souza, G., Waschina, S., Pande, S., Bohl, K., Kaleta, C., Kost, C.: Less is more: Selective advantages can

- 372 explain the prevalent loss of biosynthetic genes in bacteria. *Evolution* **68**(9), 2559–2570 (2014).  
373 doi:[10.1111/evo.12468](https://doi.org/10.1111/evo.12468)
- 374 23. Mones, E., Vicsek, L., Vicsek, T.: Hierarchy measure for complex networks. *PLoS ONE* **7**(3), 1–10 (2012).  
375 doi:[10.1371/journal.pone.0033799](https://doi.org/10.1371/journal.pone.0033799). [1202.0191](https://doi.org/10.1202.0191)
- 376 24. Lipson, D.A.: The complex relationship between microbial growth rate and yield and its implications for  
377 ecosystem processes. *Frontiers in Microbiology* **6**(JUN), 1–5 (2015). doi:[10.3389/fmicb.2015.00615](https://doi.org/10.3389/fmicb.2015.00615)
- 378 25. Beardmore, R.E., Gudelj, I., Lipson, D.A., Hurst, L.D.: Metabolic trade-offs and the maintenance of the fittest  
379 and the flattest. *Nature* **472**(7343), 342–6 (2011). doi:[10.1038/nature09905](https://doi.org/10.1038/nature09905)
- 380 26. Russell, J.B., Cook, G.M.: Energetics of bacterial growth: balance of anabolic and catabolic reactions.  
381 *Microbiological reviews* **59**(1), 48–62 (1995)
- 382 27. Sinsabaugh, R.L., Manzoni, S., Moorhead, D.L., Richter, A.: Carbon use efficiency of microbial communities:  
383 stoichiometry, methodology and modelling. *Ecology Letters* **16**(7), 930–939 (2013). doi:[10.1111/ele.12113](https://doi.org/10.1111/ele.12113)
- 384 28. Novak, M., Pfeiffer, T., Lenski, R.E., Sauer, U., Bonhoeffer, S.: Experimental tests for an evolutionary trade-off  
385 between growth rate and yield in *E. coli*. *The American naturalist* **168**(2), 242–51 (2006). doi:[10.1086/506527](https://doi.org/10.1086/506527)
- 386 29. Girvan, M., Newman, M.E.J.: Community structure in social and biological networks. *Proceedings of the*  
387 *National Academy of Sciences of the United States of America* **99**(12), 7821–7826 (2002).  
388 doi:[10.1073/pnas.122653799](https://doi.org/10.1073/pnas.122653799). [01121110](https://doi.org/10.1121110)
- 389 30. Da Silva, M.R., Ma, H., Zeng, A.P.: Centrality, network capacity, and modularity as parameters to analyze the  
390 core-periphery structure in metabolic networks. *Proceedings of the IEEE* **96**(8), 1411–1420 (2008).  
391 doi:[10.1109/JPROC.2008.925418](https://doi.org/10.1109/JPROC.2008.925418)
- 392 31. Felsenstein, J.: Phylogenies and the Comparative Method. *The American Naturalist* **125**(1), 1–15 (1985).  
393 doi:[10.1086/284325](https://doi.org/10.1086/284325)
- 394 32. Shapiro, B.J., Polz, M.F.: Ordering microbial diversity into ecologically and genetically cohesive units. *Trends in*  
395 *Microbiology* **22**(5), 235–247 (2014). doi:[10.1016/j.tim.2014.02.006](https://doi.org/10.1016/j.tim.2014.02.006). [NIHMS150003](https://doi.org/10.1101/0003)
- 396 33. Dekel, E., Mangan, S., Alon, U.: Environmental selection of the feed-forward loop circuit in gene-regulation  
397 networks. *Phys. Biol. Phys. Biol* **2**(2), 81–81 (2005). doi:[10.1088/1478-3975/2/2/001](https://doi.org/10.1088/1478-3975/2/2/001)
- 398 34. Leskovec, J., Sosič, R.: SNAP: A General-Purpose Network Analysis and Graph-Mining Library. *ACM*  
399 *Transactions on Intelligent Systems and Technology* **8**(1), 1–20 (2016). doi:[10.1145/2898361](https://doi.org/10.1145/2898361)
- 400 35. Chiu, H.C., Levy, R., Borenstein, E.: Emergent Biosynthetic Capacity in Simple Microbial Communities. *PLoS*  
401 *Computational Biology* **10**(7) (2014). doi:[10.1371/journal.pcbi.1003695](https://doi.org/10.1371/journal.pcbi.1003695)
- 402 36. Zaneveld, J., Turnbaugh, P.J., Lozupone, C., Ley, R.E., Hamady, M., Gordon, J.I., Knight, R.: Host-bacterial  
403 coevolution and the search for new drug targets. *Current Opinion in Chemical Biology* **12**(1), 109–114 (2008).  
404 doi:[10.1016/j.cbpa.2008.01.015](https://doi.org/10.1016/j.cbpa.2008.01.015). [NIHMS150003](https://doi.org/10.1101/0003)
- 405 37. DeSantis, T.Z., Hugenholtz, P., Larsen, N., Rojas, M., Brodie, E.L., Keller, K., Huber, T., Dalevi, D., Hu, P.,  
406 Andersen, G.L.: Greengenes, a chimera-checked 16S rRNA gene database and workbench compatible with ARB.  
407 *Applied and Environmental Microbiology* **72**(7), 5069–5072 (2006). doi:[10.1128/AEM.03006-05](https://doi.org/10.1128/AEM.03006-05)
- 408 38. Caporaso, J.G., Bittinger, K., Bushman, F.D., Desantis, T.Z., Andersen, G.L., Knight, R.: PyNAST: A flexible  
409 tool for aligning sequences to a template alignment. *Bioinformatics* **26**(2), 266–267 (2010).  
410 doi:[10.1093/bioinformatics/btp636](https://doi.org/10.1093/bioinformatics/btp636)
- 411 39. Kimura, M.: A simple method for estimating evolutionary rates of base substitutions through comparative  
412 studies of nucleotide sequences. *Journal of Molecular Evolution* **16**(2), 111–120 (1980).  
413 doi:[10.1007/BF01731581](https://doi.org/10.1007/BF01731581). [arXiv:1011.1669v3](https://arxiv.org/abs/1011.1669v3)
- 414 40. Ogata, H., Goto, S., Sato, K., Fujibuchi, W., Bono, H., Kanehisa, M.: KEGG: Kyoto encyclopedia of genes and  
415 genomes. *Nucleic Acids Research* **27**(1), 29–34 (1999). doi:[10.1093/nar/27.1.29](https://doi.org/10.1093/nar/27.1.29)
- 416 41. Stelzer, M., Sun, J., Zeng, A.-P., Kamphans, T., Fekete, S.P.: An extended bioreaction database that  
417 significantly improves reconstruction and analysis of genome-scale metabolic networks. *Journal of Chemical*  
418 *Information and Modeling* **53**, 1689–1699 (2013). doi:[10.1017/CBO9781107415324.004](https://doi.org/10.1017/CBO9781107415324.004). [arXiv:1011.1669v3](https://arxiv.org/abs/1011.1669v3)
- 419 42. Stamatakis, A.: RAxML version 8: A tool for phylogenetic analysis and post-analysis of large phylogenies.  
420 *Bioinformatics* **30**(9), 1312–1313 (2014). doi:[10.1093/bioinformatics/btu033](https://doi.org/10.1093/bioinformatics/btu033). [bioinformatics/btu033](https://doi.org/10.1101/0003)
- 421 43. Couturier, E., Rocha, E.P.C.: Replication-associated gene dosage effects shape the genomes of fast-growing  
422 bacteria but only for transcription and translation genes. *Molecular Microbiology* **59**(5), 1506–1518 (2006).

423      doi:[10.1111/j.1365-2958.2006.05046.x](https://doi.org/10.1111/j.1365-2958.2006.05046.x)

|                      | Correlation | Partial Correlation |
|----------------------|-------------|---------------------|
| Node Count           | 0.26***     | 0.03***             |
| Edge Count           | 0.27***     | -0.02*              |
| Modularity           | 0.28***     | 0.05***             |
| GRC Hierarchy        | 0.28***     | 0.17***             |
| Luo Hierarchy        | 0.22***     | -0.06***            |
| Largest SCC Fraction | 0.30***     | 0.12***             |
| Cluster Coefficient  | 0.13***     | 0.03***             |
| Full Diameter        | 0.23***     | 0.06***             |
| Effective Diameter   | 0.20***     | 0.01                |
| SCC Count            | 0.14***     | 0.02**              |
| Mean Degree          | 0.24***     | -0.04***            |

**Table 1** Correlation of network statistics with phylogenetic distances, and partial correlation of network statistic with phylogenetic distance, controlling for the other variables. The correlation and partial correlation of GRC Hierarchy metric with genetic distance is higher than all other non-trivial metrics. \*\*\*:  $p$  value < 0.001, \*\*:  $p$  value < 0.01, \*:  $p$  value < 0.05.

424 **List of Figures**

|     |   |                                                                                  |    |
|-----|---|----------------------------------------------------------------------------------|----|
| 425 | 1 | Histogram of GRC hierarchy scores of the 2,935 bacteria in the                   |    |
| 426 |   | KEGG database. Mean degree of hierarchy is 0.279, ranging from                   |    |
| 427 |   | 0.065 for the insect symbiote <i>Candidatus Nasuia deltocephalinicola</i>        |    |
| 428 |   | to 0.385 for a <i>Blattabacterium</i> endosymbiont of <i>Nauphoeta cinerea</i> , |    |
| 429 |   | an insect endosymbiont. The hierarchy score for <i>E. coli</i> strains is 0.269. | 17 |
| 430 | 2 | The relationship between hierarchical character and growth rate re-              |    |
| 431 |   | fects fundamental tradeoffs between growth and yield and is informa-             |    |
| 432 |   | tive about the ecological niche the bacteria occupy. Overall, growth             |    |
| 433 |   | rate is inversely correlated with hierarchy (Spearman's rank correla-            |    |
| 434 |   | tion, $\rho = -0.31$ , $p = 0.00065$ ). When controlling for bacterial envi-     |    |
| 435 |   | ronment the trend becomes stronger ( $\rho = -0.41$ , $p = 0.0001$ ). The        |    |
| 436 |   | outlier in the facultative parasite pane is <i>Borrelia burgdorferi</i> , which  |    |
| 437 |   | is an obligate parasite that alternates between insect and vertebrate            |    |
| 438 |   | hosts, and thus is similar to the obligate parasites. The particular             |    |
| 439 |   | strain also lacks a number of enzymes in its glycolysis pathway that             |    |
| 440 |   | are present in other <i>B. burgdorferi</i> strains that have hierarchy scores    |    |
| 441 |   | of $0.183 \pm 0.002$ . . . . .                                                   | 18 |
| 442 | 3 | Hierarchy has a slight overall decrease with phylogenetic distance               |    |
| 443 |   | (Spearman's rank correlation, $\rho = -0.06$ , $p < 10^{-6}$ ). Hierarchy ap-    |    |
| 444 |   | pears to increase and then decrease further from the root of the tree.           | 19 |
| 445 | 4 | Modularity increases with phylogenetic distance (Spearman's rank                 |    |
| 446 |   | correlation, $\rho = 0.31$ , $p < 10^{-15}$ ). . . . .                           | 20 |



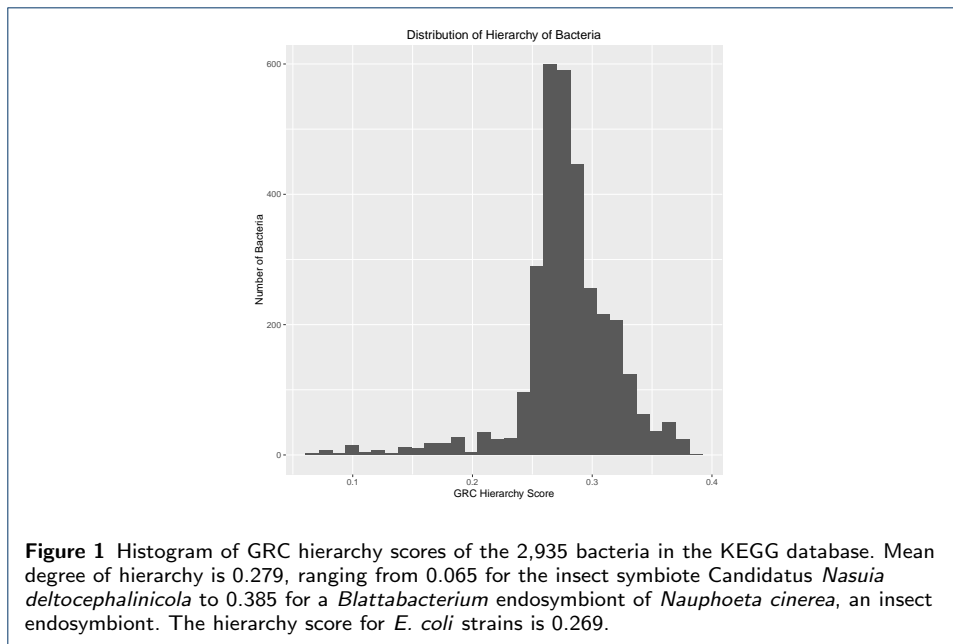

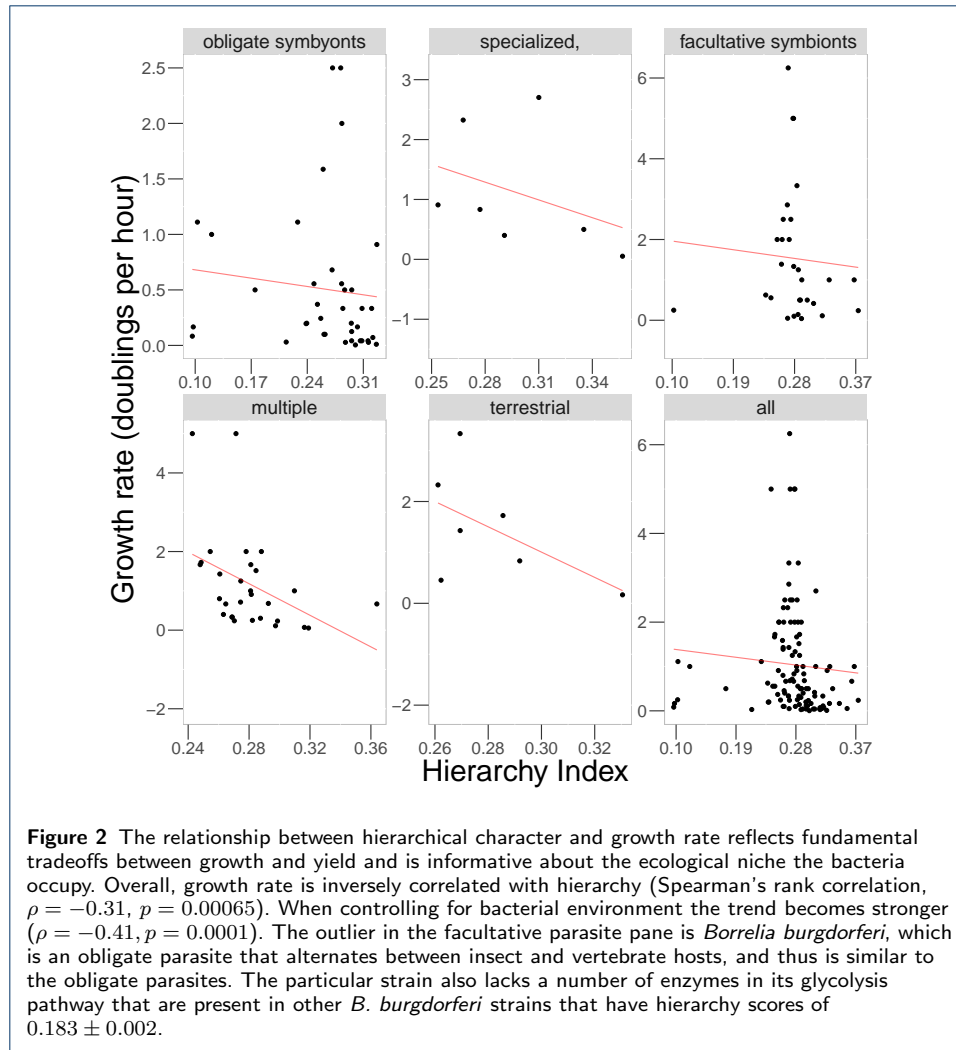

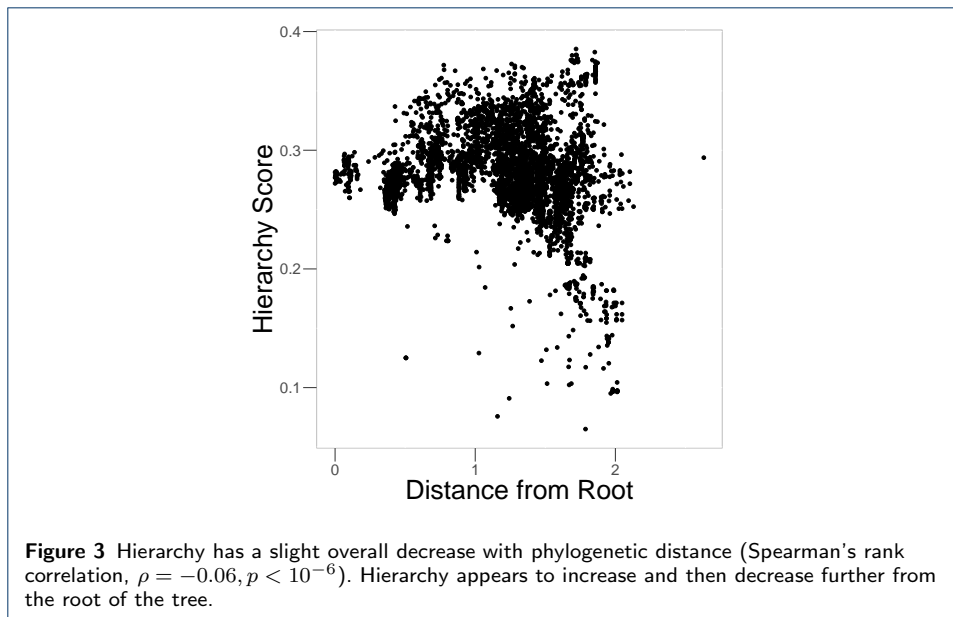

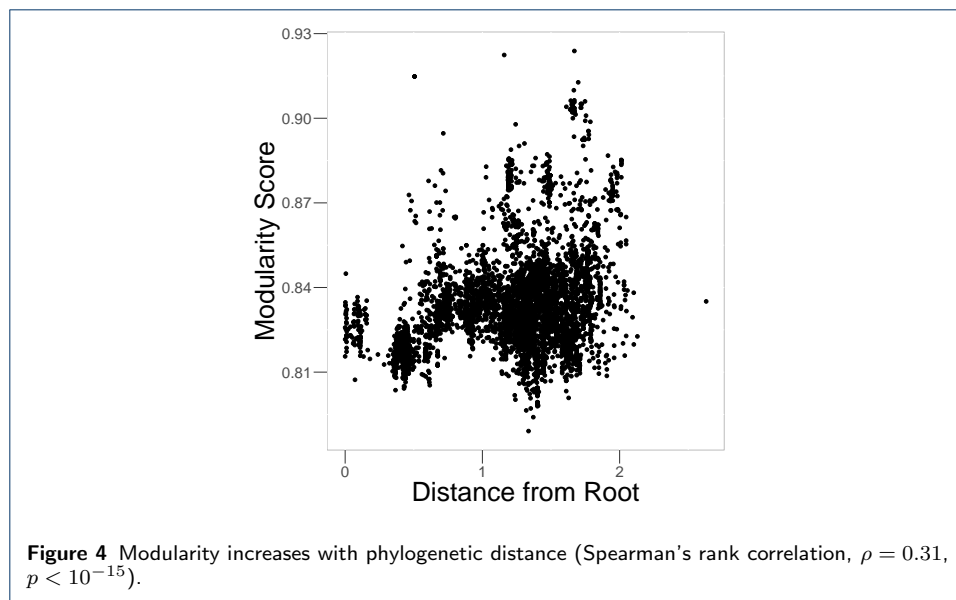

Source: https://www.biorxiv.org/content/10.1101/118299v2.full.pdf
